# Supplementary material for: The Metabolomics Society—Current State of the Membership and Future Directions
Source: MDPI journal article supplement (doi:10.3390/metabo9050089), 2019-05-03
Supplement: s1 [file s1]

## Q1 In what type of institution do you work?

Answered: 393 Skipped: 0

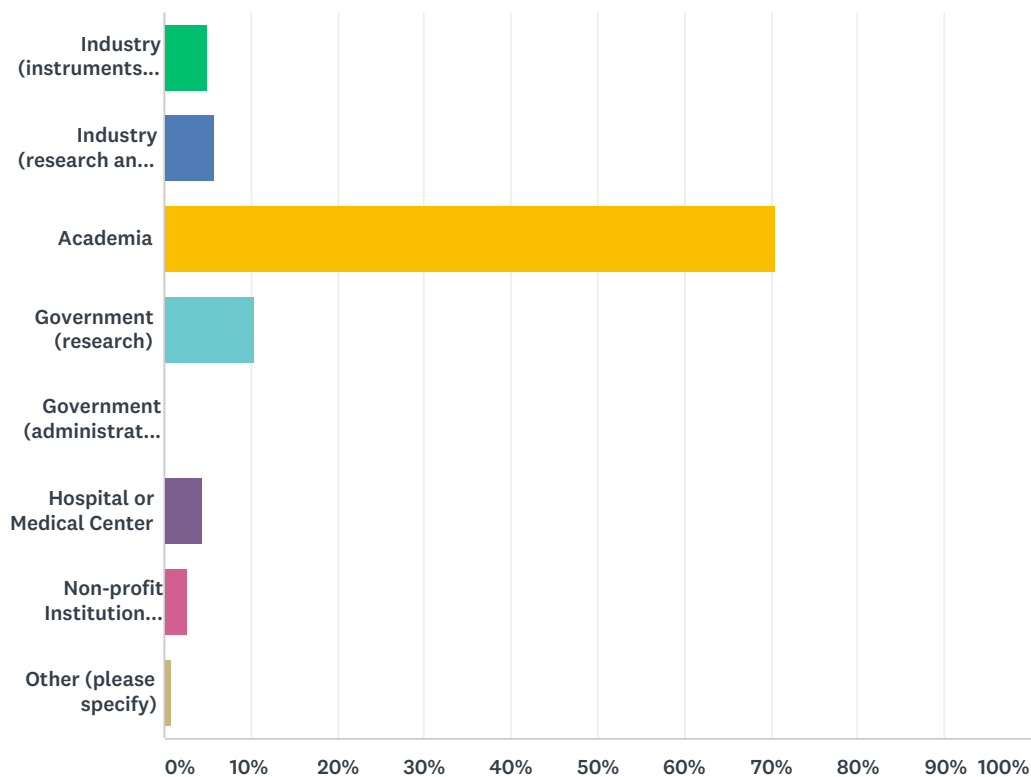

| ANSWER CHOICES                                         | RESPONSES |     |
|--------------------------------------------------------|-----------|-----|
| Industry (instruments, software, consumables and kits) | 5.09%     | 20  |
| Industry (research and development)                    | 5.85%     | 23  |
| Academia                                               | 70.48%    | 277 |
| Government (research)                                  | 10.43%    | 41  |
| Government (administration)                            | 0.25%     | 1   |
| Hospital or Medical Center                             | 4.33%     | 17  |
| Non-profit Institution (other than academic)           | 2.80%     | 11  |
| Other (please specify)                                 | 0.76%     | 3   |
| TOTAL                                                  |           | 393 |

## Q2 In what geographical region is your main research operation?

Answered: 391 Skipped: 2

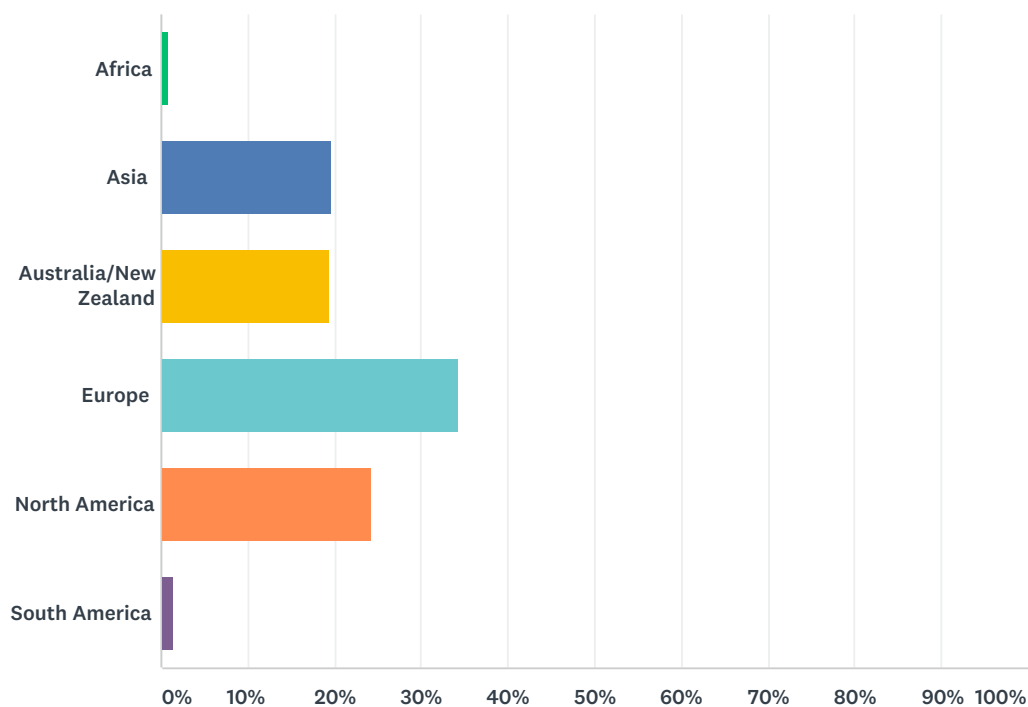

| ANSWER CHOICES        | RESPONSES |     |
|-----------------------|-----------|-----|
| Africa                | 0.77%     | 3   |
| Asia                  | 19.69%    | 77  |
| Australia/New Zealand | 19.44%    | 76  |
| Europe                | 34.27%    | 134 |
| North America         | 24.30%    | 95  |
| South America         | 1.53%     | 6   |
| TOTAL                 |           | 391 |

### Q3 Please list the country of your main research operation.

Answered: 355   Skipped: 38

## Q4 Which best describes your current professional status?

Answered: 391 Skipped: 2

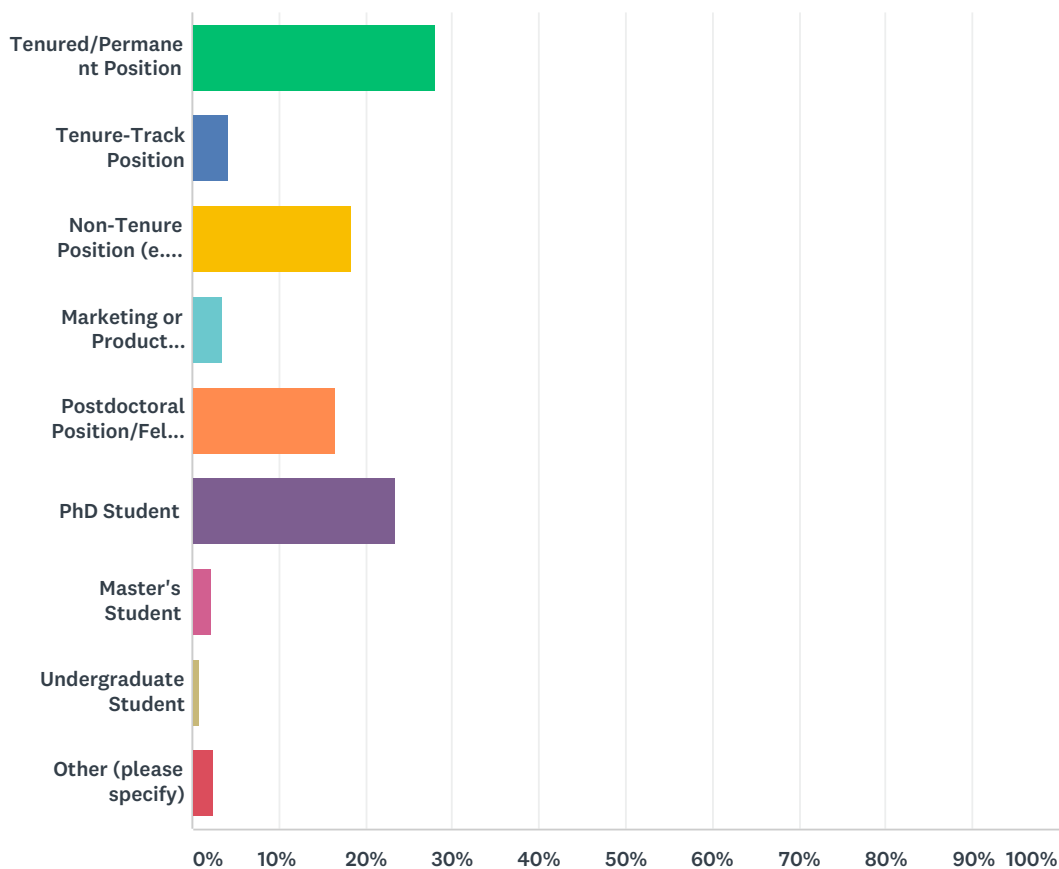

| ANSWER CHOICES                                                   | RESPONSES |            |
|------------------------------------------------------------------|-----------|------------|
| Tenured/Permanent Position                                       | 28.13%    | 110        |
| Tenure-Track Position                                            | 4.09%     | 16         |
| Non-Tenure Position (e.g. staff scientist, contract appointment) | 18.41%    | 72         |
| Marketing or Product Specialist                                  | 3.58%     | 14         |
| Postdoctoral Position/Fellowship                                 | 16.62%    | 65         |
| PhD Student                                                      | 23.53%    | 92         |
| Master's Student                                                 | 2.30%     | 9          |
| Undergraduate Student                                            | 0.77%     | 3          |
| Other (please specify)                                           | 2.56%     | 10         |
| <b>TOTAL</b>                                                     |           | <b>391</b> |

## Q5 How long have you been working in the field of metabolomics?

Answered: 391 Skipped: 2

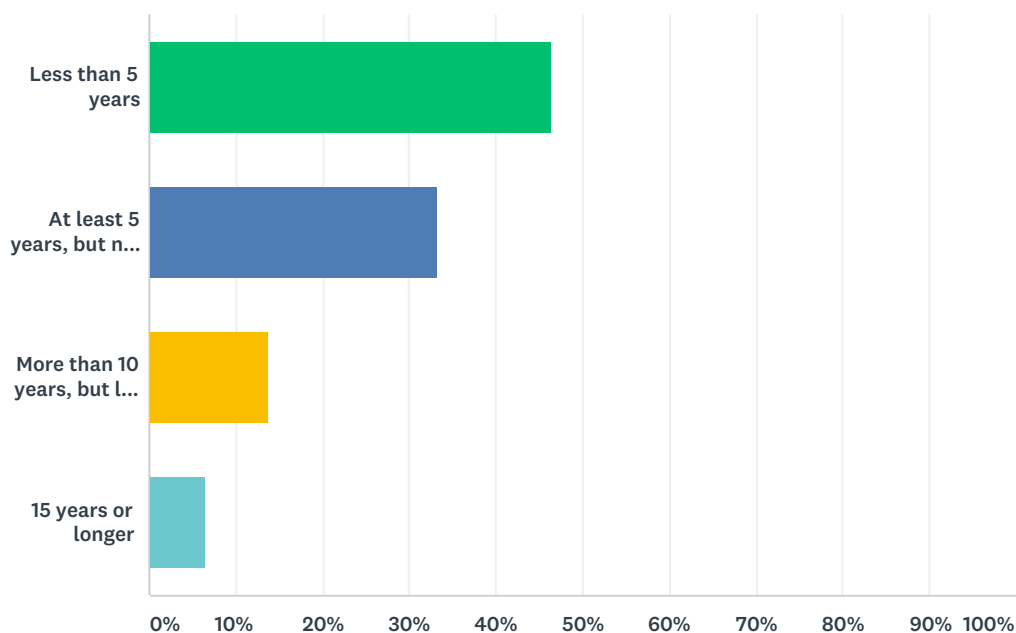

| ANSWER CHOICES                              | RESPONSES |     |
|---------------------------------------------|-----------|-----|
| Less than 5 years                           | 46.55%    | 182 |
| At least 5 years, but no more than 10 years | 33.25%    | 130 |
| More than 10 years, but less than 15 years  | 13.81%    | 54  |
| 15 years or longer                          | 6.39%     | 25  |
| TOTAL                                       |           | 391 |

## Q6 What is your gender?

Answered: 392 Skipped: 1

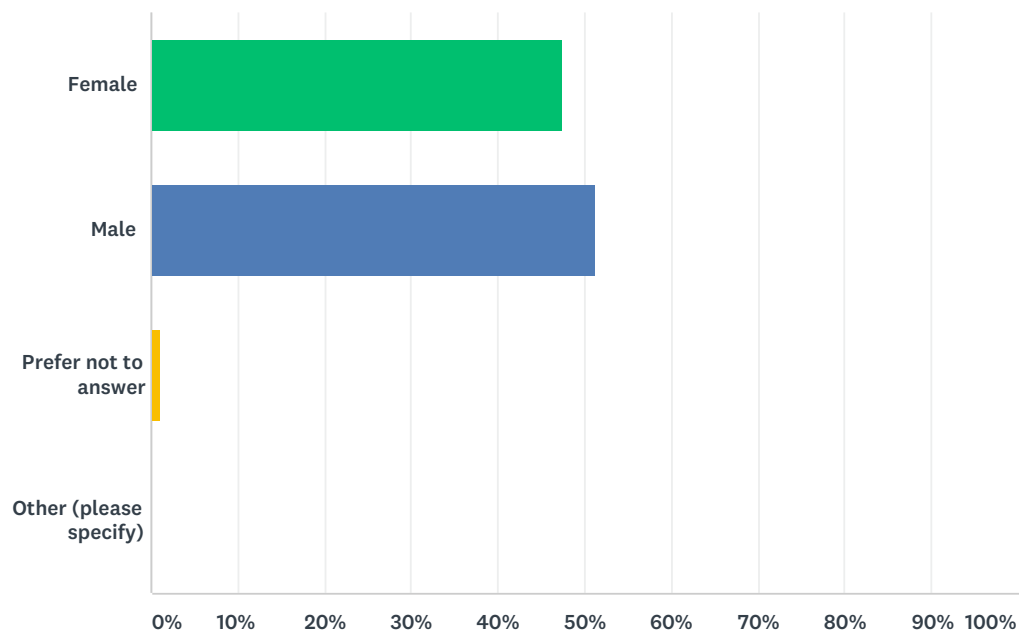

| ANSWER CHOICES         |  | RESPONSES |     |
|------------------------|--|-----------|-----|
| Female                 |  | 47.45%    | 186 |
| Male                   |  | 51.28%    | 201 |
| Prefer not to answer   |  | 1.02%     | 4   |
| Other (please specify) |  | 0.26%     | 1   |
| TOTAL                  |  |           | 392 |

**Q7 In what area(s) of science are you currently applying metabolomics?  
Choose all that apply.**

Answered: 391   Skipped: 2

## Metabolomics Society Membership Survey

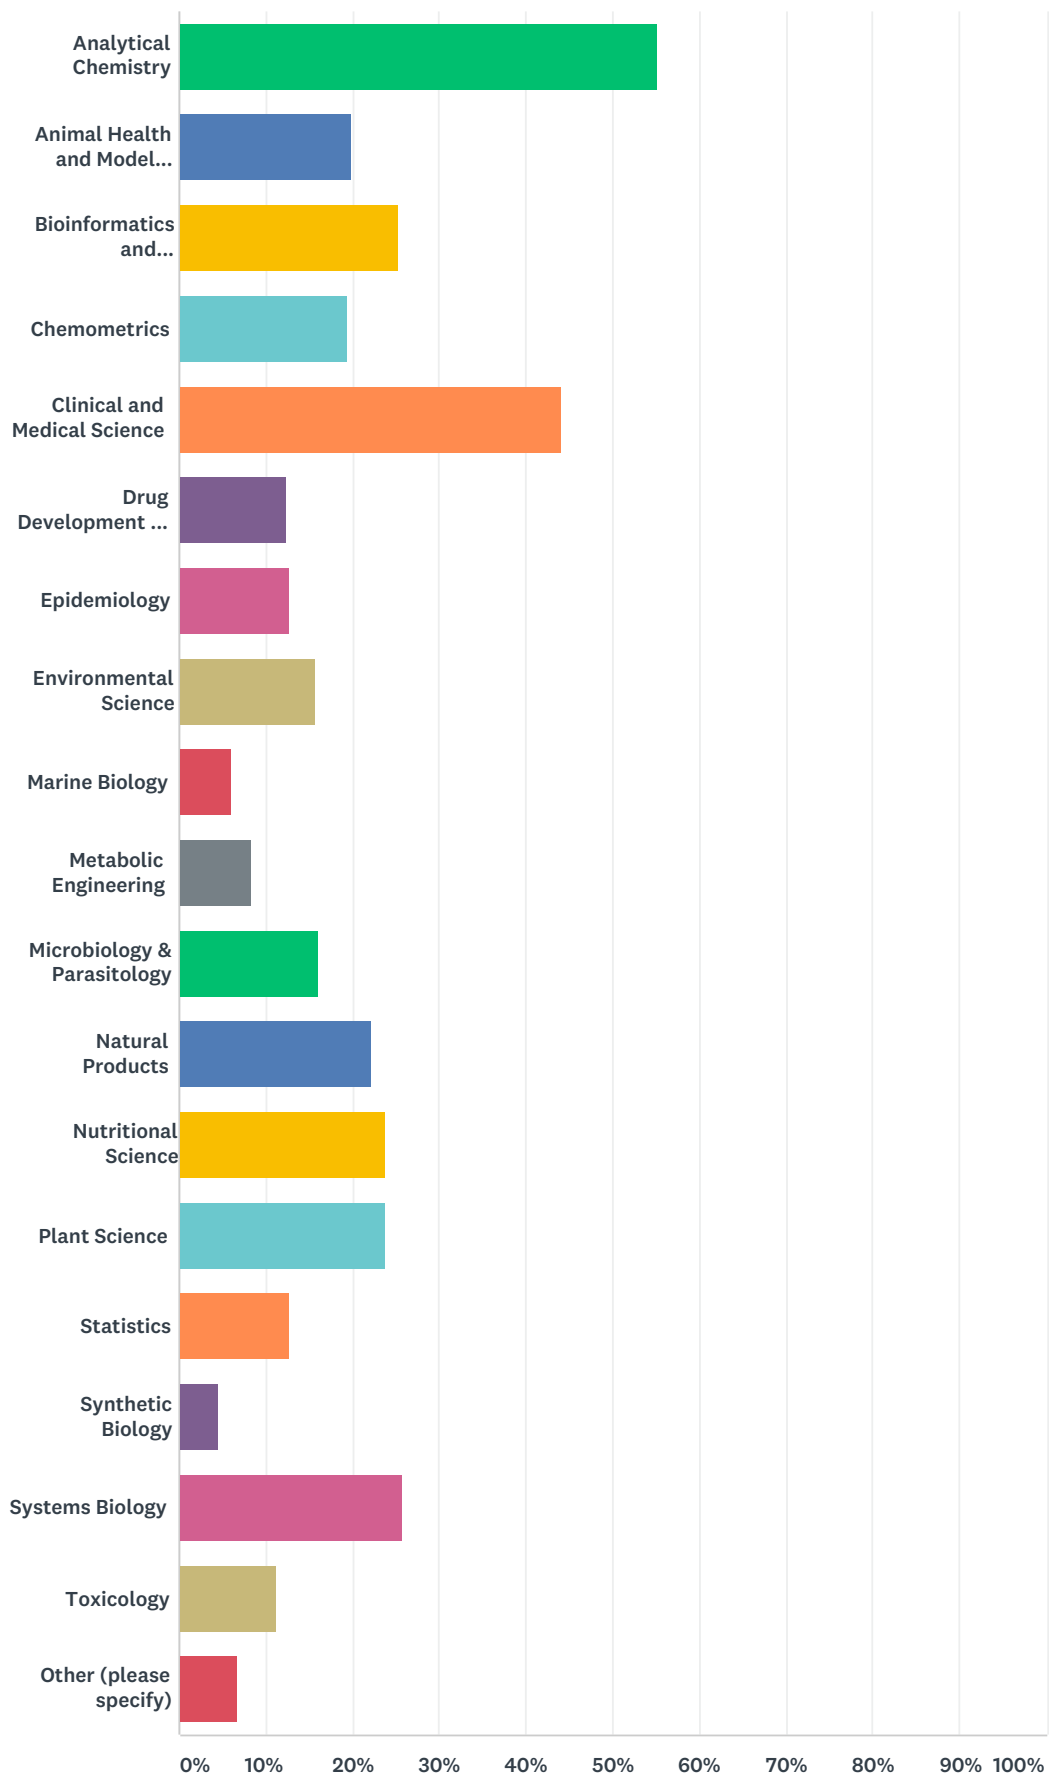

ANSWER CHOICES

RESPONSES



## Metabolomics Society Membership Survey

|                                          |        |     |
|------------------------------------------|--------|-----|
| Analytical Chemistry                     | 55.24% | 216 |
| Animal Health and Model Systems          | 19.95% | 78  |
| Bioinformatics and Computational Biology | 25.32% | 99  |
| Chemometrics                             | 19.44% | 76  |
| Clinical and Medical Science             | 44.25% | 173 |
| Drug Development and Discovery           | 12.28% | 48  |
| Epidemiology                             | 12.79% | 50  |
| Environmental Science                    | 15.60% | 61  |
| Marine Biology                           | 6.14%  | 24  |
| Metabolic Engineering                    | 8.44%  | 33  |
| Microbiology & Parasitology              | 16.11% | 63  |
| Natural Products                         | 22.25% | 87  |
| Nutritional Science                      | 23.79% | 93  |
| Plant Science                            | 23.79% | 93  |
| Statistics                               | 12.79% | 50  |
| Synthetic Biology                        | 4.60%  | 18  |
| Systems Biology                          | 25.83% | 101 |
| Toxicology                               | 11.25% | 44  |
| Other (please specify)                   | 6.65%  | 26  |
| Total Respondents: 391                   |        |     |

## Q8 When did you first join the Metabolomics Society?

Answered: 377 Skipped: 16

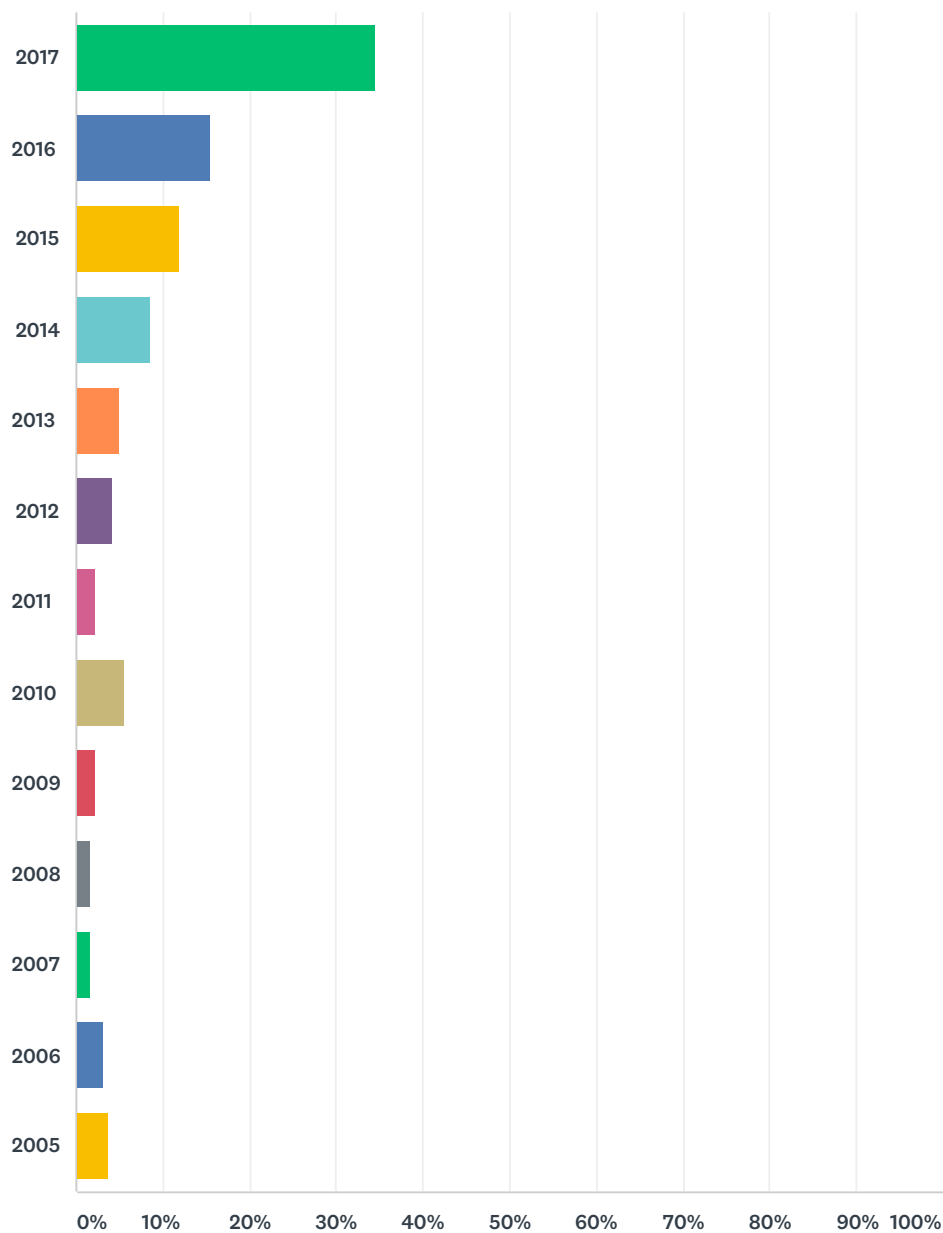

| ANSWER CHOICES | RESPONSES |     |
|----------------|-----------|-----|
| 2017           | 34.48%    | 130 |
| 2016           | 15.38%    | 58  |
| 2015           | 11.94%    | 45  |
| 2014           | 8.49%     | 32  |
| 2013           | 5.04%     | 19  |
| 2012           | 4.24%     | 16  |

## Metabolomics Society Membership Survey

|       |       |     |
|-------|-------|-----|
| 2011  | 2.39% | 9   |
| 2010  | 5.57% | 21  |
| 2009  | 2.39% | 9   |
| 2008  | 1.59% | 6   |
| 2007  | 1.59% | 6   |
| 2006  | 3.18% | 12  |
| 2005  | 3.71% | 14  |
| TOTAL |       | 377 |

## Q9 Have you been to a Metabolomics Society Annual Conference?

Answered: 391 Skipped: 2

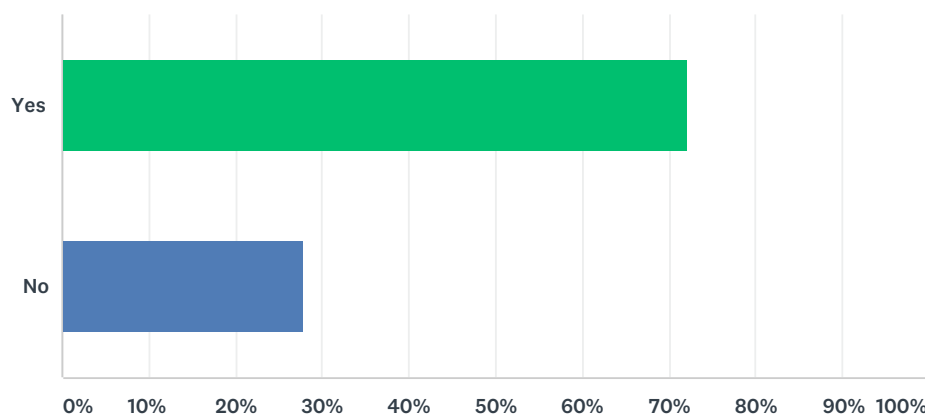

| ANSWER CHOICES |  | RESPONSES |     |
|----------------|--|-----------|-----|
| Yes            |  | 72.12%    | 282 |
| No             |  | 27.88%    | 109 |
| TOTAL          |  |           | 391 |

## Q10 Which Metabolomics Society Annual Conference(s) have you attended? Choose all that apply.

Answered: 280 Skipped: 113

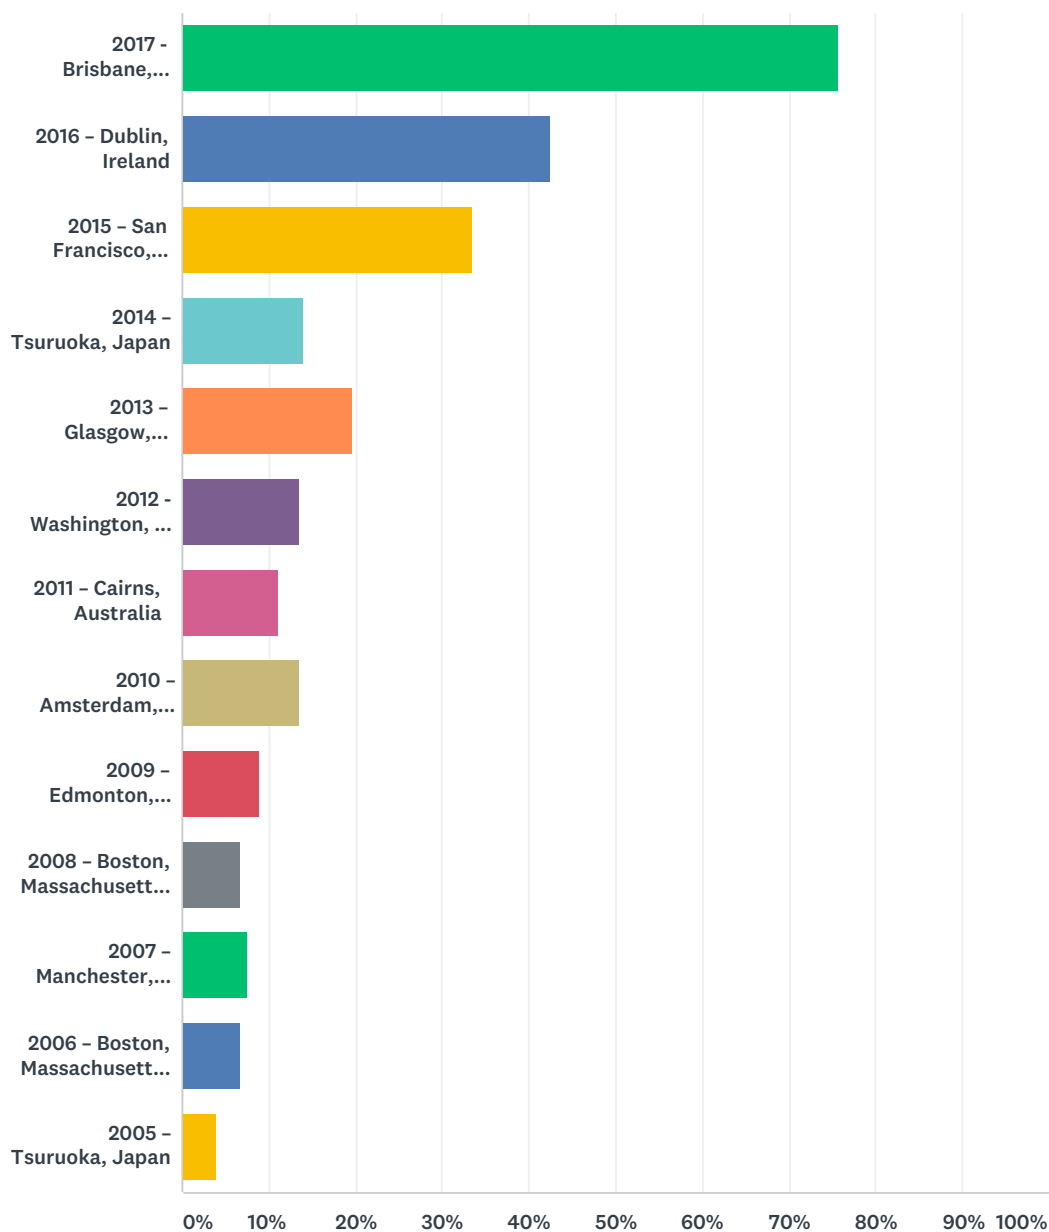

| ANSWER CHOICES                        | RESPONSES |     |
|---------------------------------------|-----------|-----|
| 2017 - Brisbane, Australia            | 75.71%    | 212 |
| 2016 - Dublin, Ireland                | 42.50%    | 119 |
| 2015 - San Francisco, California, USA | 33.57%    | 94  |
| 2014 - Tsuruoka, Japan                | 13.93%    | 39  |
| 2013 - Glasgow, Scotland              | 19.64%    | 55  |

## Metabolomics Society Membership Survey

|                                   |        |    |
|-----------------------------------|--------|----|
| 2012 - Washington, DC, USA        | 13.57% | 38 |
| 2011 – Cairns, Australia          | 11.07% | 31 |
| 2010 – Amsterdam, Netherlands     | 13.57% | 38 |
| 2009 – Edmonton, Alberta, Canada  | 8.93%  | 25 |
| 2008 – Boston, Massachusetts, USA | 6.79%  | 19 |
| 2007 – Manchester, United Kingdom | 7.50%  | 21 |
| 2006 – Boston, Massachusetts, USA | 6.79%  | 19 |
| 2005 – Tsuruoka, Japan            | 3.93%  | 11 |
| Total Respondents: 280            |        |    |

# Q11 Do you remain a member in the years that you do not attend the annual Metabolomics Society meeting?

Answered: 278 Skipped: 115

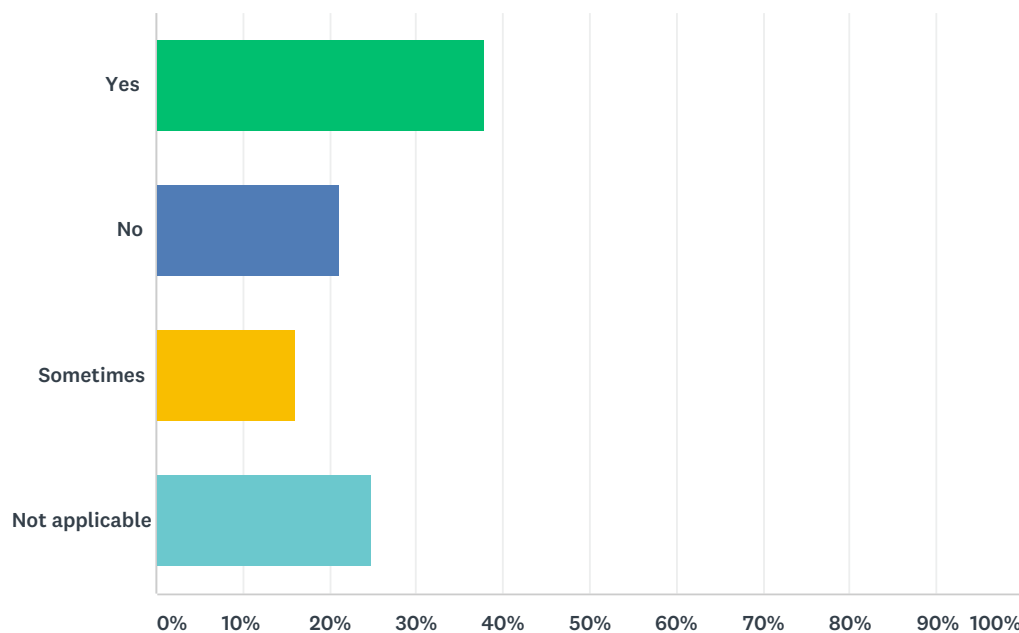

| ANSWER CHOICES | RESPONSES |     |
|----------------|-----------|-----|
| Yes            | 37.77%    | 105 |
| No             | 21.22%    | 59  |
| Sometimes      | 16.19%    | 45  |
| Not applicable | 24.82%    | 69  |
| TOTAL          |           | 278 |

**Q12 When you attended annual Metabolomics Society meeting(s), did you also attend any of the Workshops, which generally take place the day prior to the official start of the meeting?**

Answered: 152 Skipped: 241

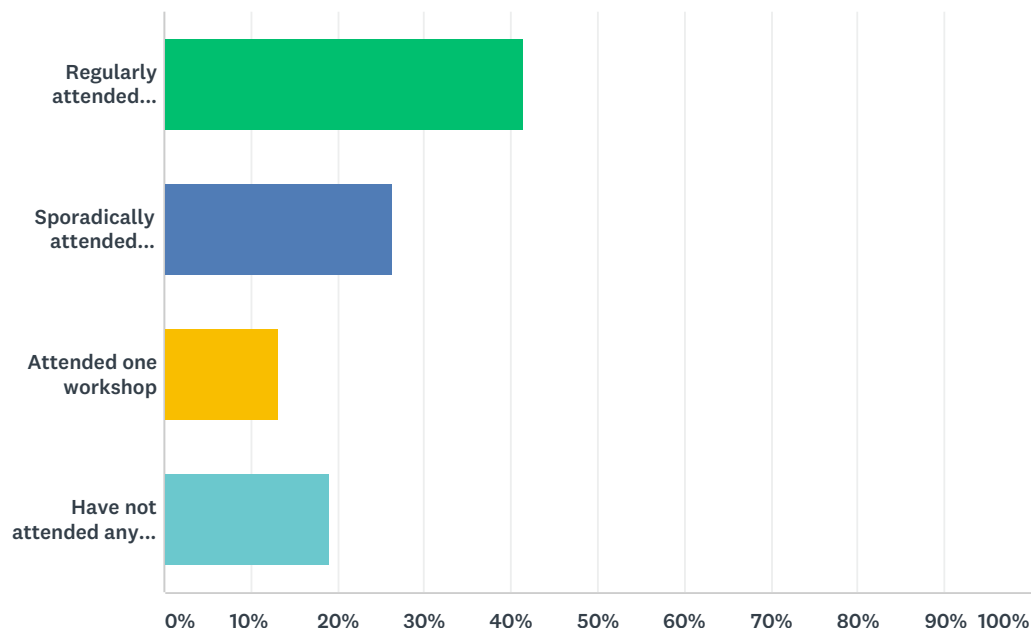

| ANSWER CHOICES                  | RESPONSES |     |
|---------------------------------|-----------|-----|
| Regularly attended workshops    | 41.45%    | 63  |
| Sporadically attended workshops | 26.32%    | 40  |
| Attended one workshop           | 13.16%    | 20  |
| Have not attended any workshops | 19.08%    | 29  |
| TOTAL                           |           | 152 |



### Q13 When you attended the Workshop(s), was it clear that the purpose of these sessions was for training?

Answered: 121 Skipped: 272

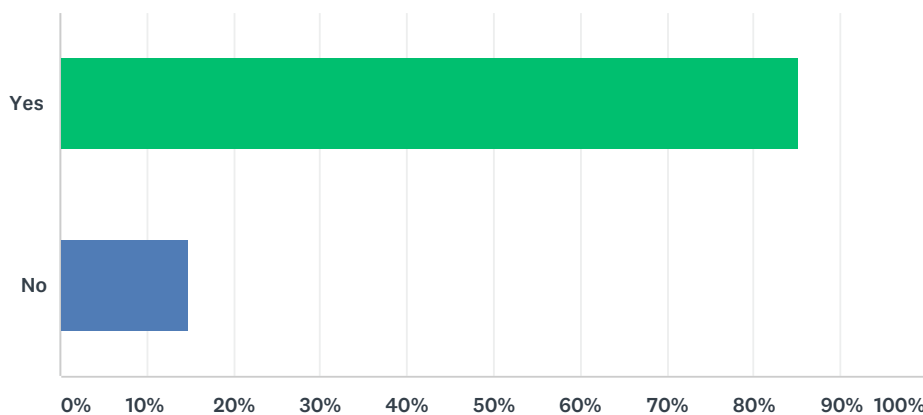

| ANSWER CHOICES |  | RESPONSES |     |
|----------------|--|-----------|-----|
| Yes            |  | 85.12%    | 103 |
| No             |  | 14.88%    | 18  |
| TOTAL          |  |           | 121 |

## Q14 Why was it not clear that the purpose of the Workshop(s) was for training?

Answered: 18 Skipped: 375

## Q15 Why have you not attended the Metabolomics Society Annual Conference? Choose all that apply.

Answered: 165 Skipped: 228

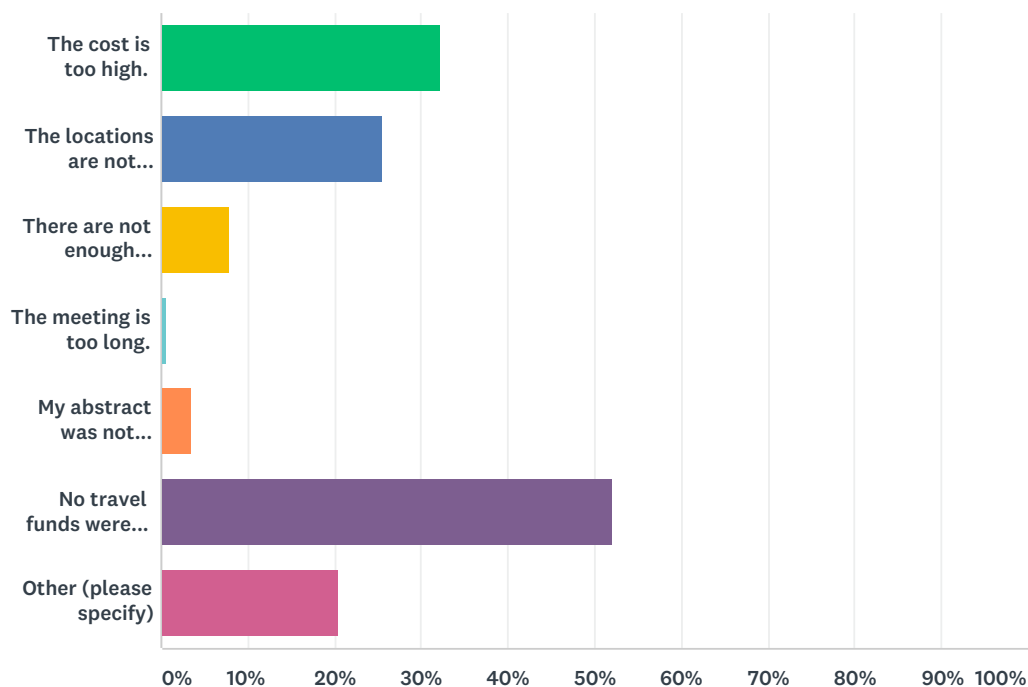

| ANSWER CHOICES                                             | RESPONSES |    |
|------------------------------------------------------------|-----------|----|
| The cost is too high.                                      | 32.12%    | 53 |
| The locations are not convenient.                          | 25.45%    | 42 |
| There are not enough scientific sessions that interest me. | 7.88%     | 13 |
| The meeting is too long.                                   | 0.61%     | 1  |
| My abstract was not selected for an oral presentation.     | 3.64%     | 6  |
| No travel funds were available.                            | 52.12%    | 86 |
| Other (please specify)                                     | 20.61%    | 34 |
| Total Respondents: 165                                     |           |    |

## Q16 What do you consider to be the most important benefits of being a Metabolomics Society member? Choose all that apply.

Answered: 362 Skipped: 31

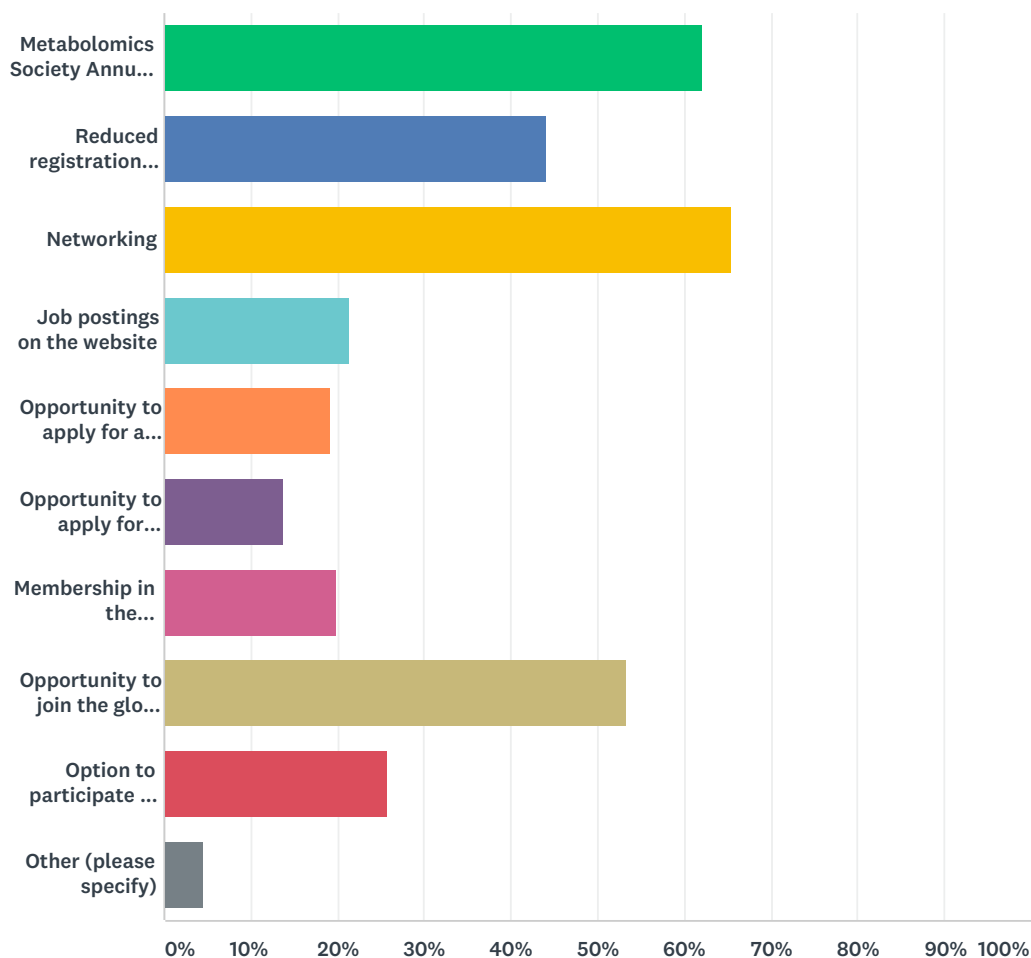

| ANSWER CHOICES                                                                                                                                                                                                                                                                                                        | RESPONSES |     |
|-----------------------------------------------------------------------------------------------------------------------------------------------------------------------------------------------------------------------------------------------------------------------------------------------------------------------|-----------|-----|
| Metabolomics Society Annual Meeting                                                                                                                                                                                                                                                                                   | 62.15%    | 225 |
| Reduced registration fees for the Metabolomics Society annual meeting                                                                                                                                                                                                                                                 | 44.20%    | 160 |
| Networking                                                                                                                                                                                                                                                                                                            | 65.47%    | 237 |
| Job postings on the website                                                                                                                                                                                                                                                                                           | 21.27%    | 77  |
| Opportunity to apply for a travel award                                                                                                                                                                                                                                                                               | 19.34%    | 70  |
| Opportunity to apply for conference support                                                                                                                                                                                                                                                                           | 13.81%    | 50  |
| Membership in the Early-career Member Network                                                                                                                                                                                                                                                                         | 19.89%    | 72  |
| Opportunity to join the global metabolomics community                                                                                                                                                                                                                                                                 | 53.31%    | 193 |
| Option to participate in Metabolomics Society Task Groups (e.g. Data Quality, Data Standards, Metabolite Standard Initiative, Computational Mass Spectrometry, Model Organism Metabolomes, Precision Medicine and Pharmacometabolomics, International Affairs, Industry Engagement, and Society Strategy Task Groups) | 25.69%    | 93  |

Metabolomics Society Membership Survey

|                        |       |    |
|------------------------|-------|----|
| Other (please specify) | 4.70% | 17 |
| Total Respondents: 362 |       |    |

## Q17 Have you ever participated in any of the following Metabolomics Society activities? Choose all that apply.

Answered: 206 Skipped: 187

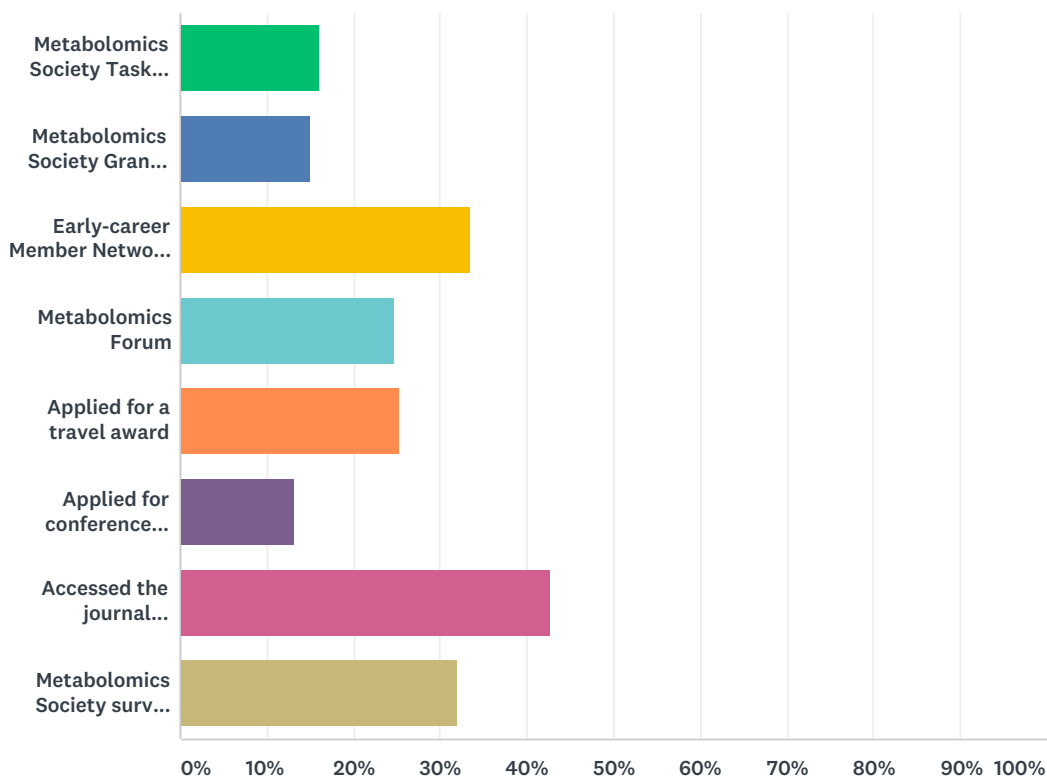

| ANSWER CHOICES                                                                                                                                                                                                                 | RESPONSES |    |
|--------------------------------------------------------------------------------------------------------------------------------------------------------------------------------------------------------------------------------|-----------|----|
| Metabolomics Society Task Group                                                                                                                                                                                                | 16.02%    | 33 |
| Metabolomics Society Grand Challenges webinar                                                                                                                                                                                  | 15.05%    | 31 |
| Early-career Member Network webinar                                                                                                                                                                                            | 33.50%    | 69 |
| Metabolomics Forum                                                                                                                                                                                                             | 24.76%    | 51 |
| Applied for a travel award                                                                                                                                                                                                     | 25.24%    | 52 |
| Applied for conference support                                                                                                                                                                                                 | 13.11%    | 27 |
| Accessed the journal "Metabolomics" through the Metabolomics Society website                                                                                                                                                   | 42.72%    | 88 |
| Metabolomics Society survey, other than the present one (e.g. Metabolomics Data Infrastructure Survey, Data Quality Task Group Survey, Training Needs in Metabolomics Survey, Computational Tools and Workflows Questionnaire) | 32.04%    | 66 |
| Total Respondents: 206                                                                                                                                                                                                         |           |    |

# Q18 What do you believe are the most important initiatives/activities that are currently supported by Metabolomics Society? Choose all that apply.

Answered: 346 Skipped: 47

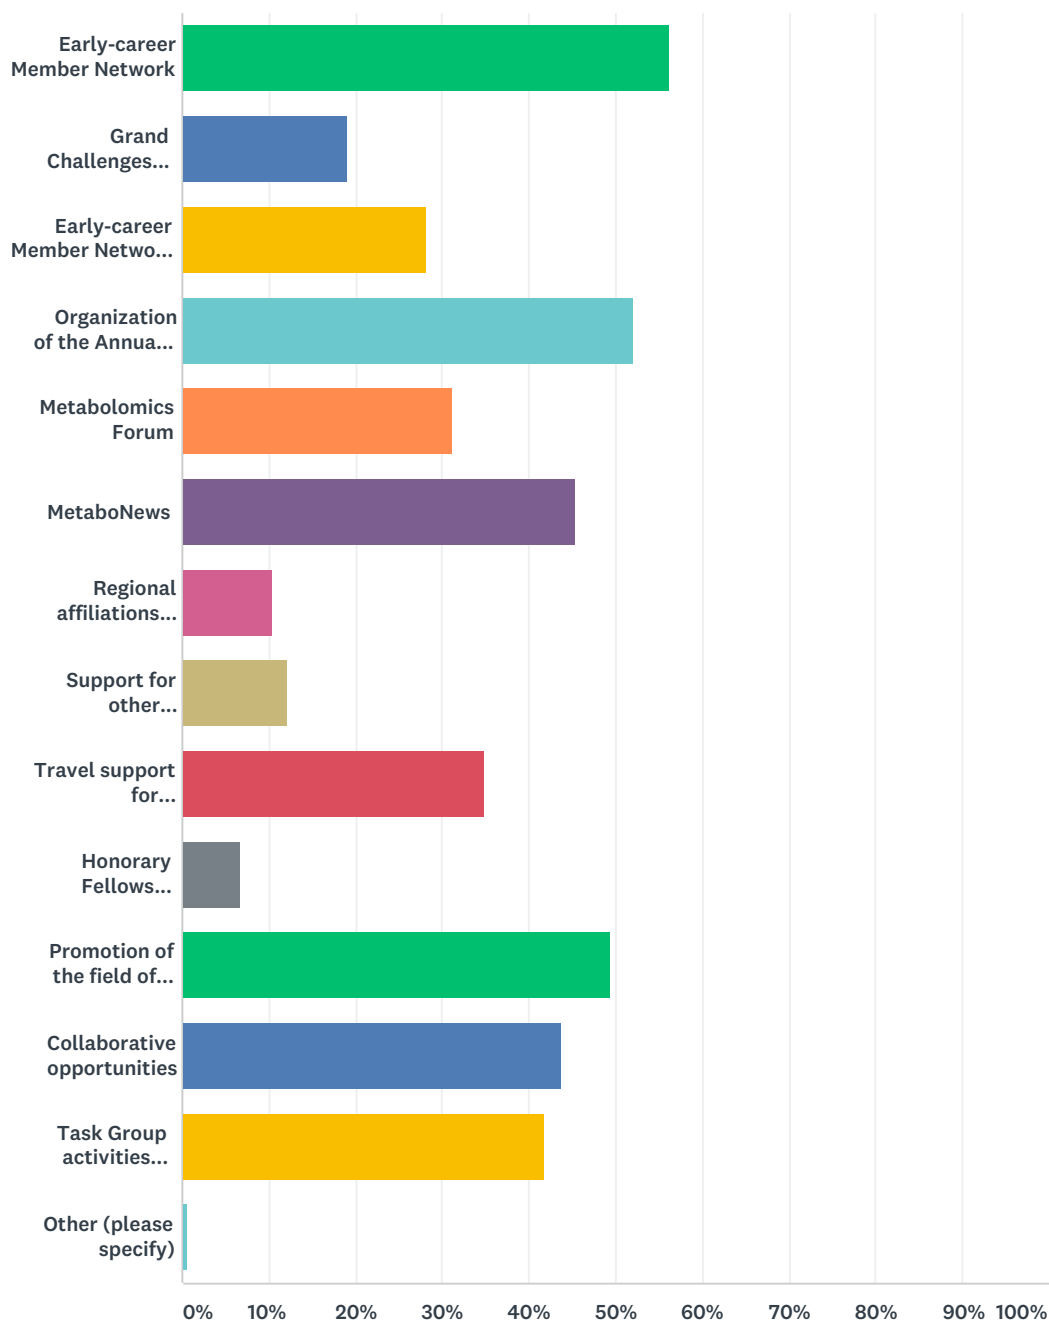

| ANSWER CHOICES                             | RESPONSES |     |
|--------------------------------------------|-----------|-----|
| Early-career Member Network                | 56.36%    | 195 |
| Grand Challenges Webinar Series            | 19.08%    | 66  |
| Early-career Member Network Webinar Series | 28.32%    | 98  |
| Organization of the Annual Meeting         | 52.02%    | 180 |

## Metabolomics Society Membership Survey

|                                                                                                                                                                                                                                                                                   |        |     |
|-----------------------------------------------------------------------------------------------------------------------------------------------------------------------------------------------------------------------------------------------------------------------------------|--------|-----|
| Metabolomics Forum                                                                                                                                                                                                                                                                | 31.21% | 108 |
| MetaboNews                                                                                                                                                                                                                                                                        | 45.38% | 157 |
| Regional affiliations/chapters                                                                                                                                                                                                                                                    | 10.40% | 36  |
| Support for other conferences                                                                                                                                                                                                                                                     | 12.14% | 42  |
| Travel support for students/EMN                                                                                                                                                                                                                                                   | 34.97% | 121 |
| Honorary Fellows Appointments                                                                                                                                                                                                                                                     | 6.65%  | 23  |
| Promotion of the field of metabolomics internationally                                                                                                                                                                                                                            | 49.42% | 171 |
| Collaborative opportunities                                                                                                                                                                                                                                                       | 43.64% | 151 |
| Task Group activities (e.g. Data Quality, Data Standards, Metabolite Standard Initiative, Computational Mass Spectrometry, Model Organism Metabolomes, Precision Medicine and Pharmacometabolomics, International Affairs, Industry Engagement, and Society Strategy Task Groups) | 41.91% | 145 |
| Other (please specify)                                                                                                                                                                                                                                                            | 0.58%  | 2   |
| Total Respondents: 346                                                                                                                                                                                                                                                            |        |     |



## Q19 What are the best strategies for the Metabolomics Society to maintain members? Choose all that apply.

Answered: 346 Skipped: 47

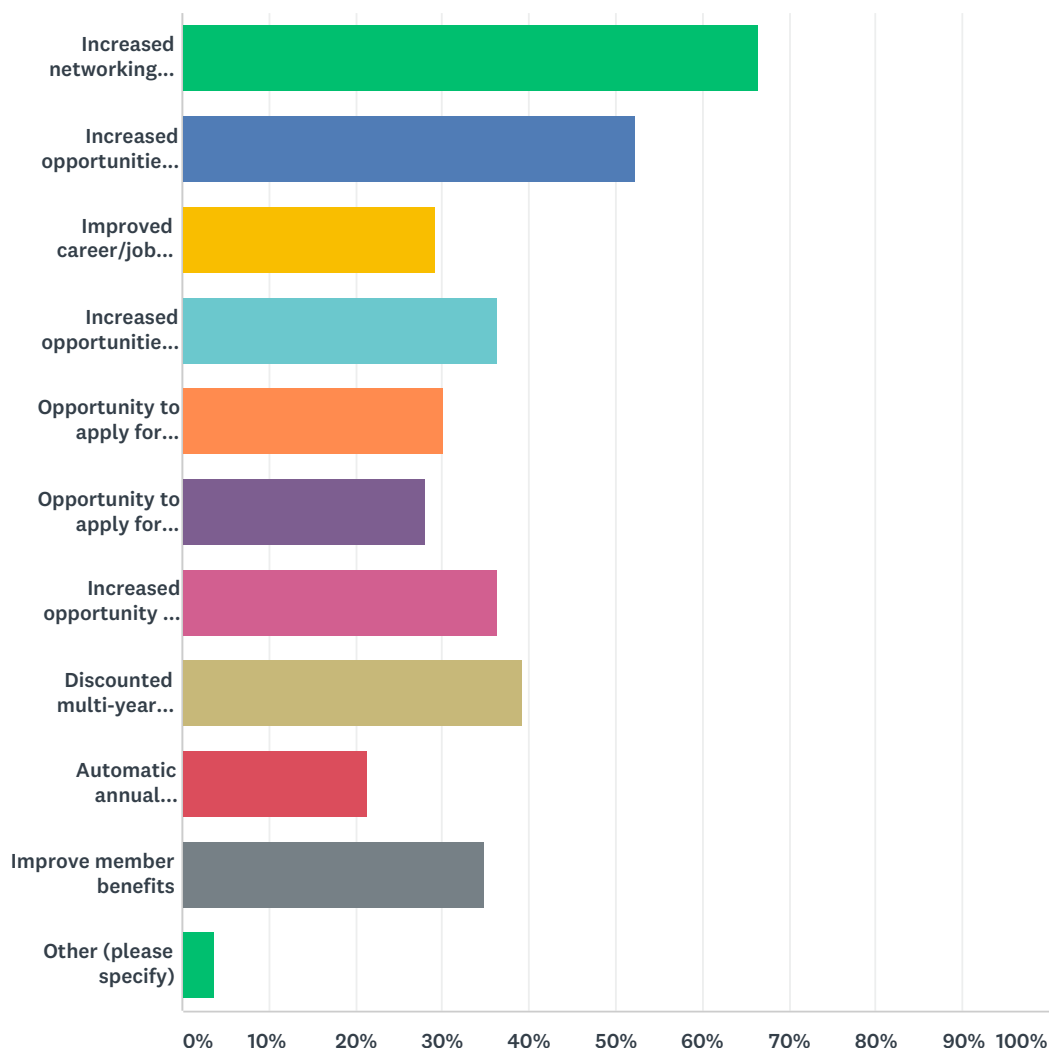

| ANSWER CHOICES                                                               | RESPONSES |     |
|------------------------------------------------------------------------------|-----------|-----|
| Increased networking among members                                           | 66.47%    | 230 |
| Increased opportunities to participate in the Annual Meetings                | 52.31%    | 181 |
| Improved career/job postings                                                 | 29.19%    | 101 |
| Increased opportunities for scientific webinars                              | 36.42%    | 126 |
| Opportunity to apply for travel funds to Annual Meeting                      | 30.06%    | 104 |
| Opportunity to apply for travel funds to any metabolomics conference/meeting | 28.03%    | 97  |
| Increased opportunity to participate in regional/local meetings              | 36.42%    | 126 |
| Discounted multi-year membership option                                      | 39.31%    | 136 |
| Automatic annual membership renewal                                          | 21.39%    | 74  |

## Metabolomics Society Membership Survey

|                         |        |     |
|-------------------------|--------|-----|
| Improve member benefits | 34.97% | 121 |
| Other (please specify)  | 3.76%  | 13  |
| Total Respondents: 346  |        |     |

## Q20 What are the best strategies for the Metabolomics Society to increase membership? Choose all that apply.

Answered: 355 Skipped: 38

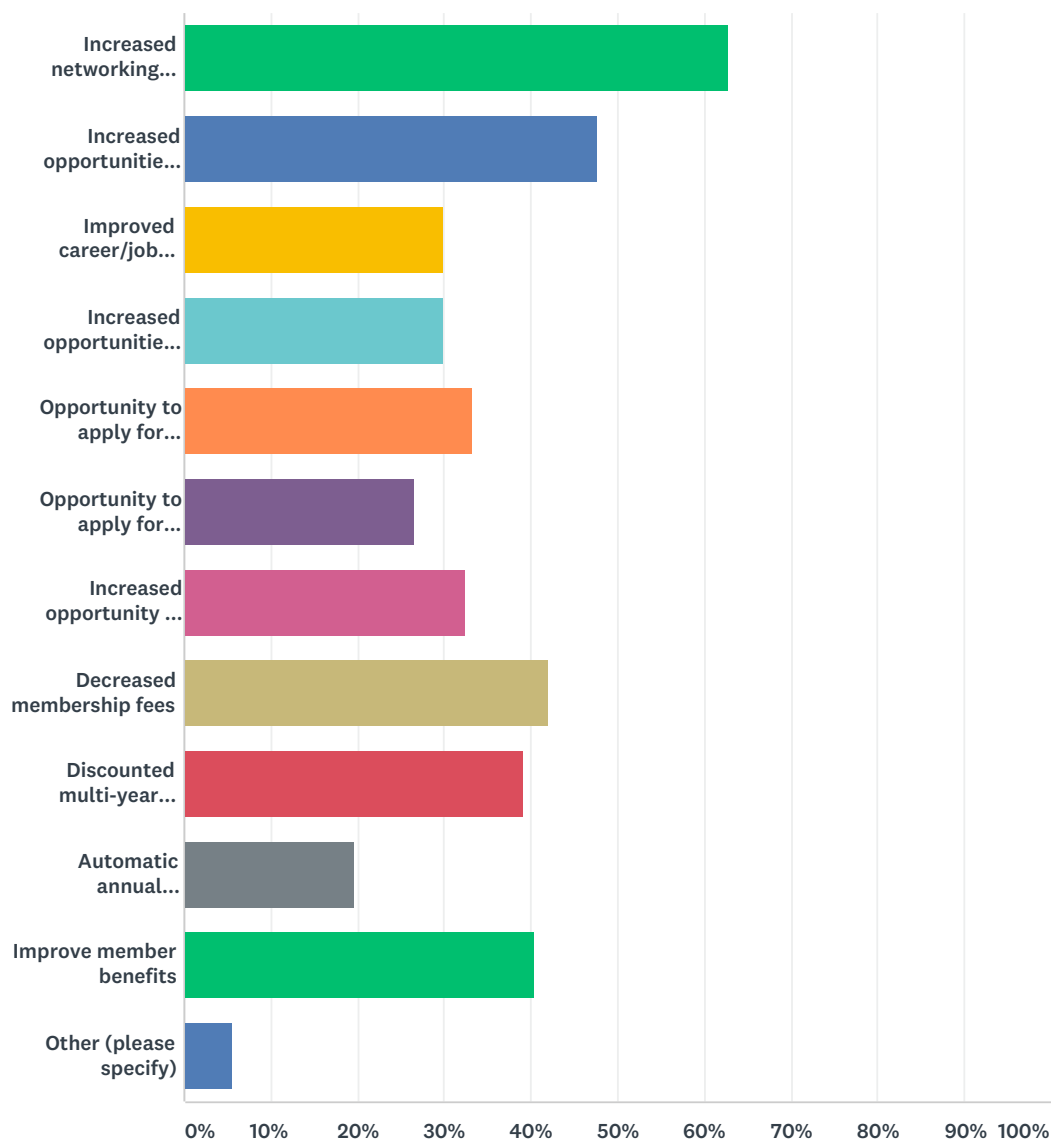

| ANSWER CHOICES                                                               | RESPONSES |     |
|------------------------------------------------------------------------------|-----------|-----|
| Increased networking among members                                           | 62.82%    | 223 |
| Increased opportunities to participate in the Annual Meetings                | 47.61%    | 169 |
| Improved career/job postings                                                 | 29.86%    | 106 |
| Increased opportunities for scientific webinars                              | 29.86%    | 106 |
| Opportunity to apply for travel funds to Annual Meeting                      | 33.24%    | 118 |
| Opportunity to apply for travel funds to any metabolomics conference/meeting | 26.48%    | 94  |
| Increased opportunity to participate in regional/local meetings              | 32.39%    | 115 |

## Metabolomics Society Membership Survey

|                                         |        |     |
|-----------------------------------------|--------|-----|
| Decreased membership fees               | 41.97% | 149 |
| Discounted multi-year membership option | 39.15% | 139 |
| Automatic annual membership renewal     | 19.72% | 70  |
| Improve member benefits                 | 40.28% | 143 |
| Other (please specify)                  | 5.63%  | 20  |
| Total Respondents: 355                  |        |     |

## Q21 What is your preferred method of communication for Metabolomics Society news and announcements?

Answered: 360 Skipped: 33

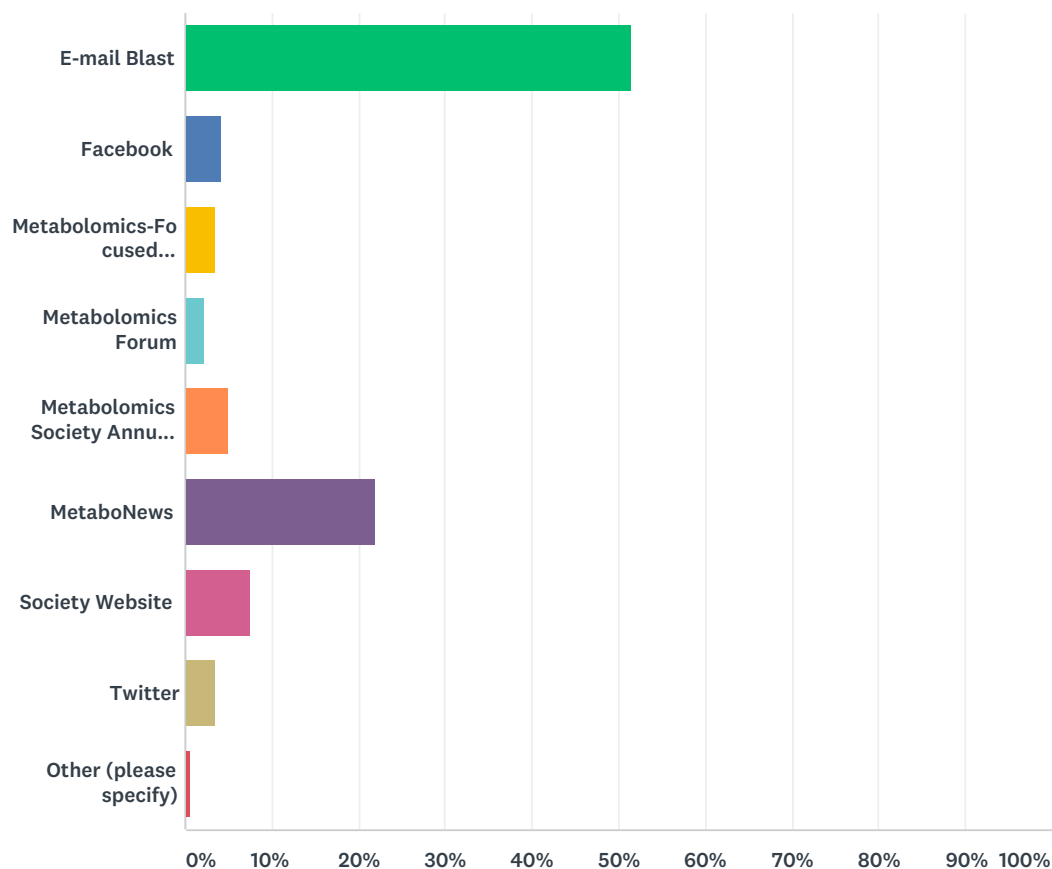

| ANSWER CHOICES                          | RESPONSES |            |
|-----------------------------------------|-----------|------------|
| E-mail Blast                            | 51.39%    | 185        |
| Facebook                                | 4.17%     | 15         |
| Metabolomics-Focused Scientific Journal | 3.61%     | 13         |
| Metabolomics Forum                      | 2.22%     | 8          |
| Metabolomics Society Annual Meeting     | 5.00%     | 18         |
| MetaboNews                              | 21.94%    | 79         |
| Society Website                         | 7.50%     | 27         |
| Twitter                                 | 3.61%     | 13         |
| Other (please specify)                  | 0.56%     | 2          |
| <b>TOTAL</b>                            |           | <b>360</b> |

## Q22 Are you a member of a Metabolomics Society affiliate? Choose all that apply.

Answered: 337 Skipped: 56

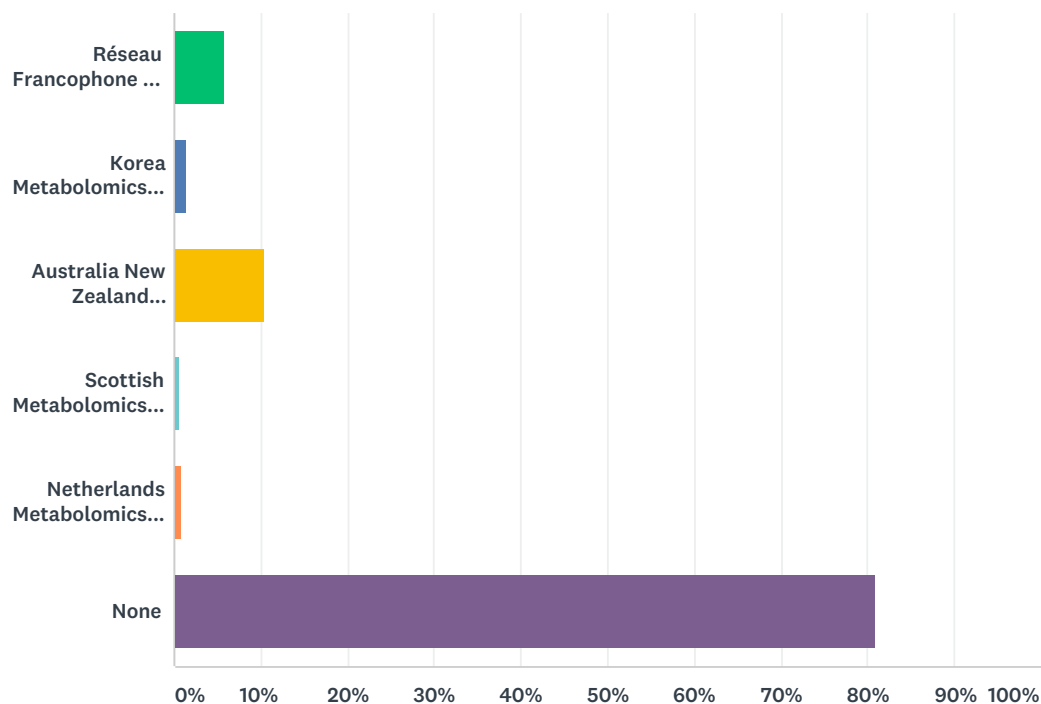

| ANSWER CHOICES                                           | RESPONSES |     |
|----------------------------------------------------------|-----------|-----|
| Réseau Francophone de Métabolomique et Fluxomique (RFMF) | 5.93%     | 20  |
| Korea Metabolomics Society                               | 1.48%     | 5   |
| Australia New Zealand Metabolomics Network ((ANZMN)      | 10.39%    | 35  |
| Scottish Metabolomics Network                            | 0.59%     | 2   |
| Netherlands Metabolomics Centre                          | 0.89%     | 3   |
| None                                                     | 81.01%    | 273 |
| Total Respondents: 337                                   |           |     |

## Q23 Are you a member of any other scientific societies? Choose all that apply.

Answered: 335 Skipped: 58

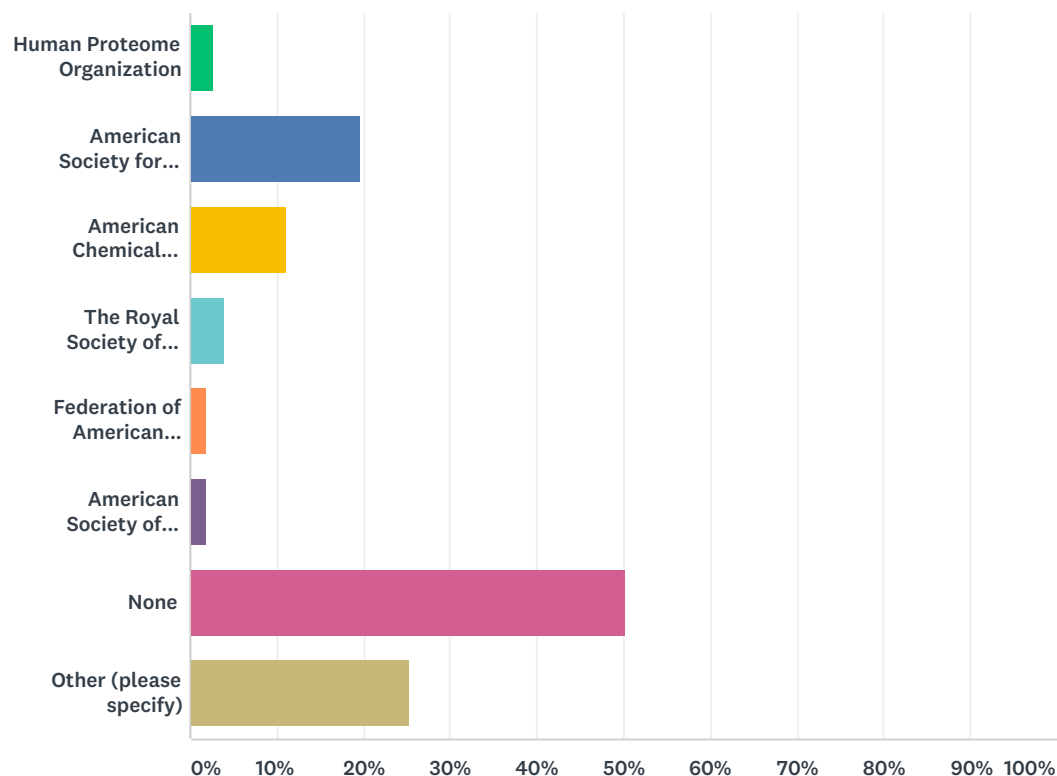

| ANSWER CHOICES                                                    | RESPONSES |     |
|-------------------------------------------------------------------|-----------|-----|
| Human Proteome Organization                                       | 2.69%     | 9   |
| American Society for Mass Spectrometry                            | 19.70%    | 66  |
| American Chemical Society                                         | 11.04%    | 37  |
| The Royal Society of Chemistry                                    | 3.88%     | 13  |
| Federation of American Societies for Experimental Biology (FASEB) | 1.79%     | 6   |
| American Society of Plant Biology                                 | 1.79%     | 6   |
| None                                                              | 50.15%    | 168 |
| Other (please specify)                                            | 25.37%    | 85  |
| Total Respondents: 335                                            |           |     |

## Q24 What other national/international scientific meetings do you regularly attend? Choose all that apply.

Answered: 239 Skipped: 154

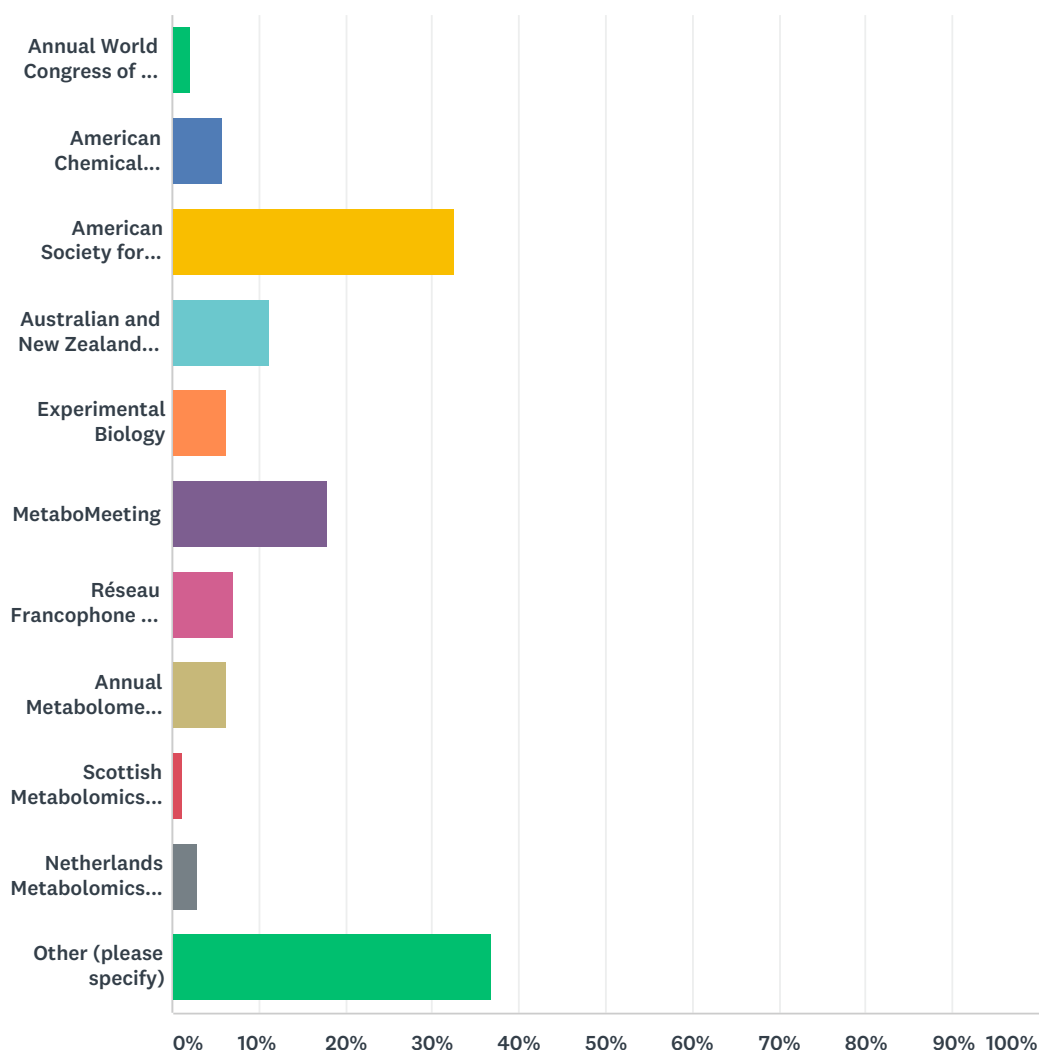

| ANSWER CHOICES                                                          | RESPONSES |    |
|-------------------------------------------------------------------------|-----------|----|
| Annual World Congress of the Human Proteome Organization                | 2.09%     | 5  |
| American Chemical Society National Meeting                              | 5.86%     | 14 |
| American Society for Mass Spectrometry Annual Conference (ASMS)         | 32.64%    | 78 |
| Australian and New Zealand Metabolomics Conference                      | 11.30%    | 27 |
| Experimental Biology                                                    | 6.28%     | 15 |
| MetaboMeeting                                                           | 17.99%    | 43 |
| Réseau Francophone de Métabolomique et Fluxomique Annual Meeting (RFMF) | 7.11%     | 17 |
| Annual Metabolome Symposium (Japan)                                     | 6.28%     | 15 |
| Scottish Metabolomics Network                                           | 1.26%     | 3  |



## Metabolomics Society Membership Survey

|                                          |        |    |
|------------------------------------------|--------|----|
| Netherlands Metabolomics Society Meeting | 2.93%  | 7  |
| Other (please specify)                   | 36.82% | 88 |
| Total Respondents: 239                   |        |    |

## Q25 In which journals have you published your metabolomics research? Choose all that apply.

Answered: 327 Skipped: 66

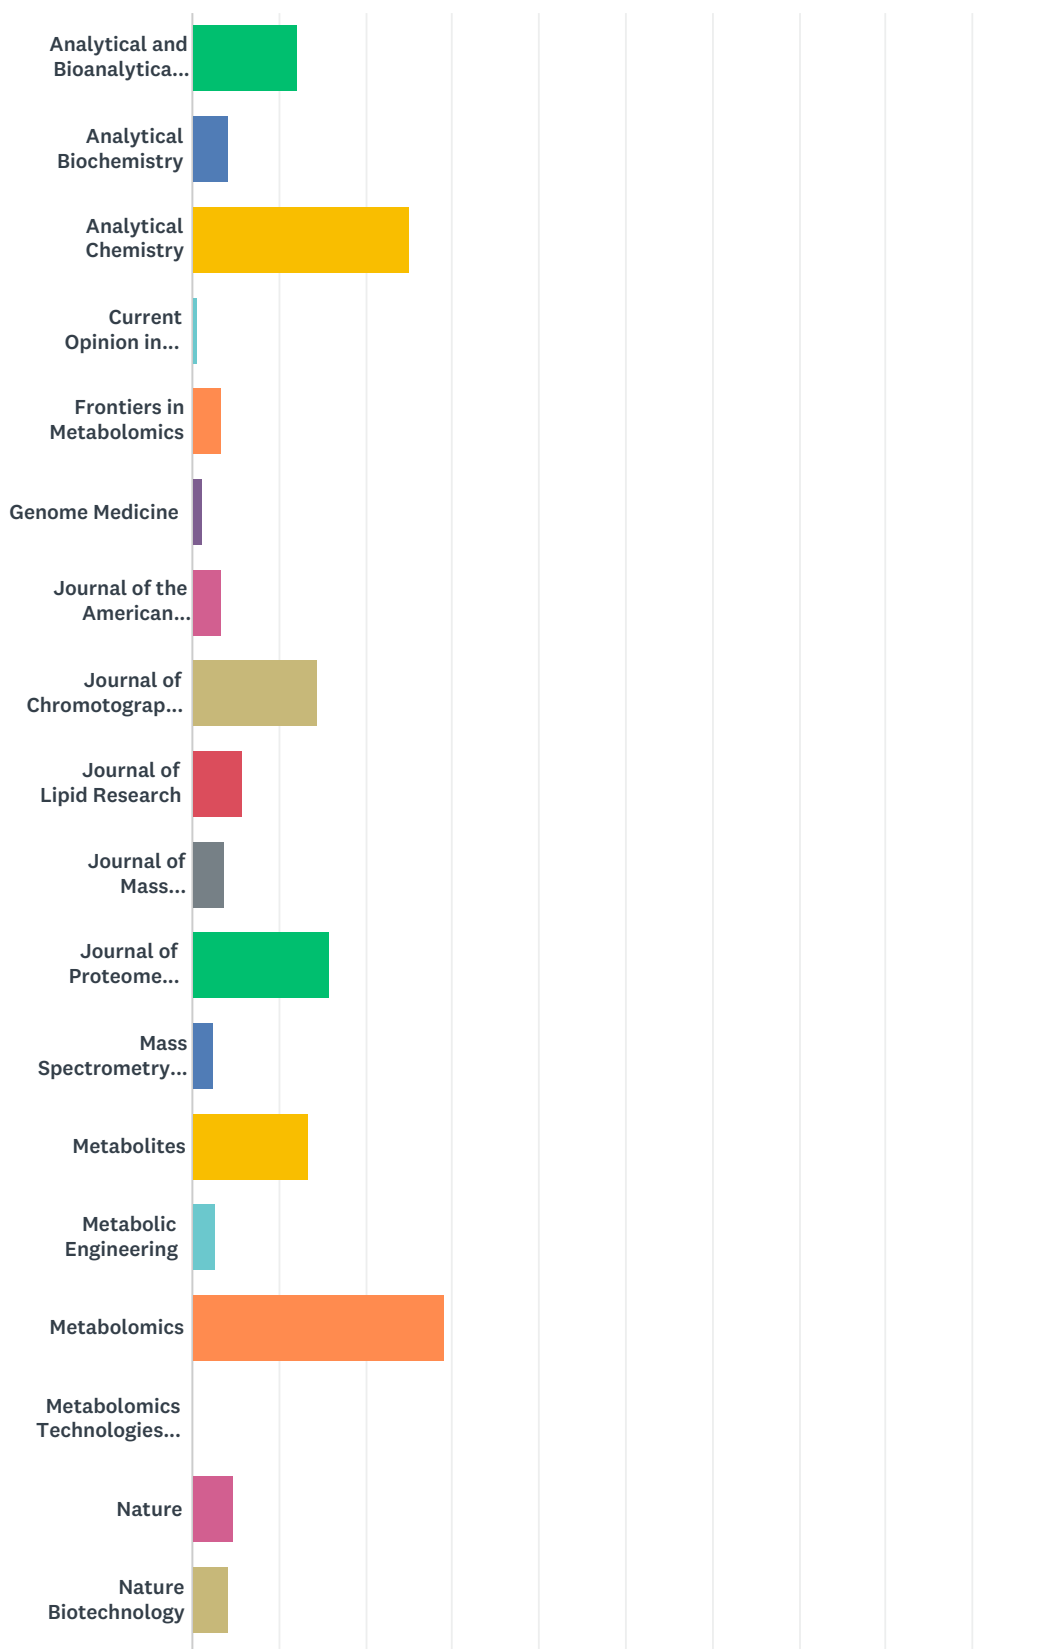

## Metabolomics Society Membership Survey

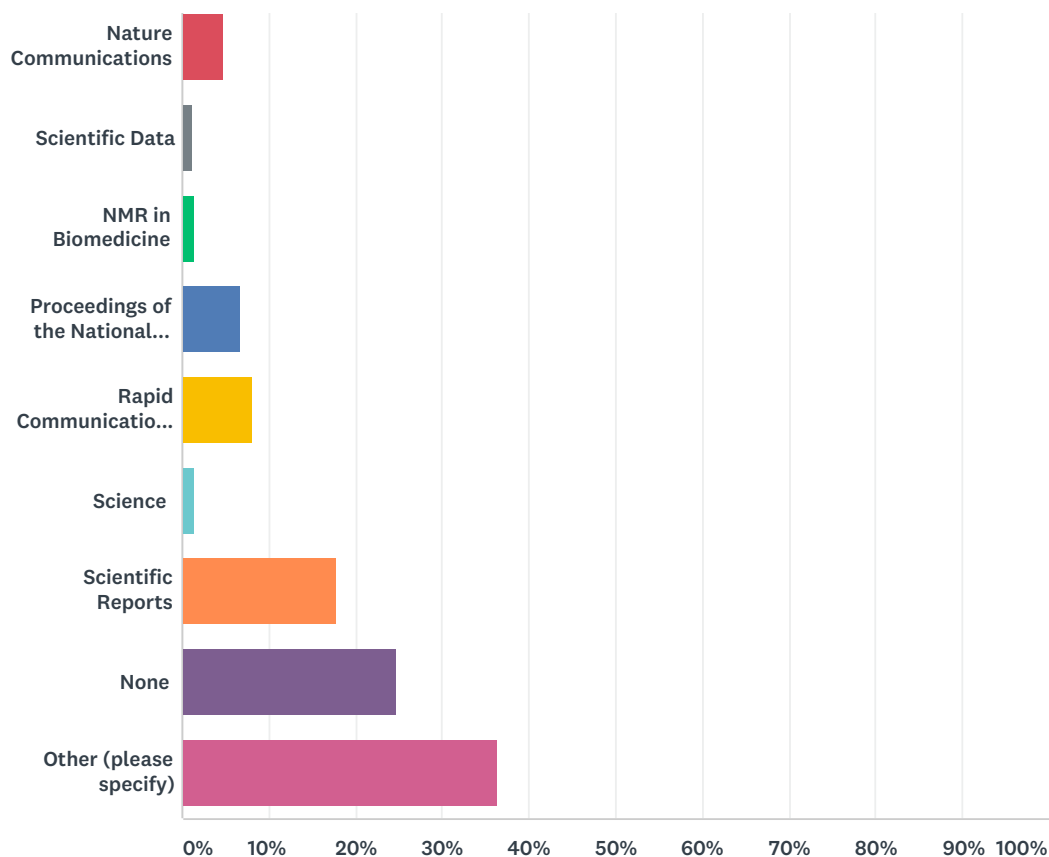

| ANSWER CHOICES                                        | RESPONSES |    |
|-------------------------------------------------------|-----------|----|
| Analytical and Bioanalytical Chemistry                | 12.23%    | 40 |
| Analytical Biochemistry                               | 4.28%     | 14 |
| Analytical Chemistry                                  | 25.08%    | 82 |
| Current Opinion in Lipidology                         | 0.61%     | 2  |
| Frontiers in Metabolomics                             | 3.36%     | 11 |
| Genome Medicine                                       | 1.22%     | 4  |
| Journal of the American Society for Mass Spectrometry | 3.36%     | 11 |
| Journal of Chromatography A and B                     | 14.37%    | 47 |
| Journal of Lipid Research                             | 5.81%     | 19 |
| Journal of Mass Spectrometry                          | 3.67%     | 12 |
| Journal of Proteome Research                          | 15.90%    | 52 |
| Mass Spectrometry Reviews                             | 2.45%     | 8  |
| Metabolites                                           | 13.46%    | 44 |
| Metabolic Engineering                                 | 2.75%     | 9  |
| Metabolomics                                          | 29.05%    | 95 |
| Metabolomics Technologies Analytical Chemistry        | 0.00%     | 0  |
| Nature                                                | 4.89%     | 16 |

## Metabolomics Society Membership Survey

|                                                |        |     |
|------------------------------------------------|--------|-----|
| Nature Biotechnology                           | 4.28%  | 14  |
| Nature Communications                          | 4.89%  | 16  |
| Scientific Data                                | 1.22%  | 4   |
| NMR in Biomedicine                             | 1.53%  | 5   |
| Proceedings of the National Academy of Science | 6.73%  | 22  |
| Rapid Communications in Mass Spectrometry      | 8.26%  | 27  |
| Science                                        | 1.53%  | 5   |
| Scientific Reports                             | 17.74% | 58  |
| None                                           | 24.77% | 81  |
| Other (please specify)                         | 36.39% | 119 |
| Total Respondents: 327                         |        |     |

## Q26 Is there a need for an official Metabolomics Society Journal?

Answered: 346 Skipped: 47

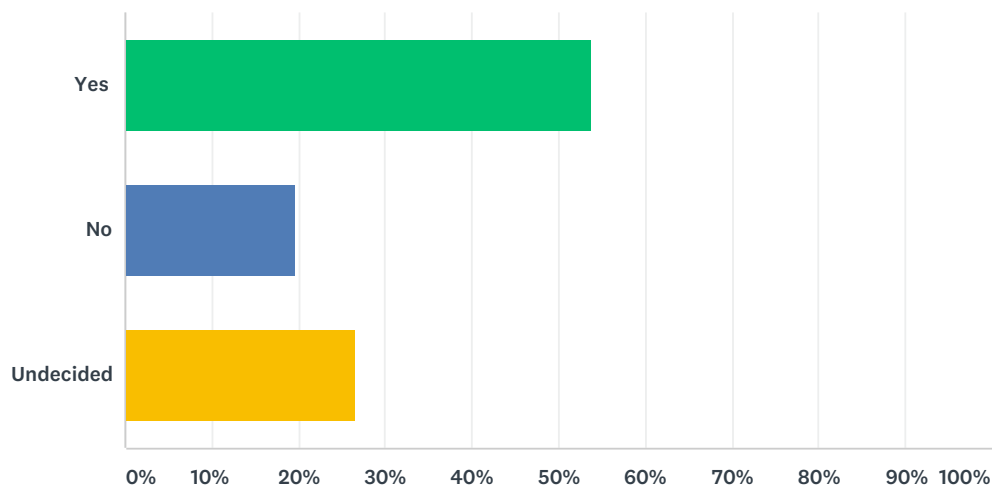

| ANSWER CHOICES | RESPONSES |     |
|----------------|-----------|-----|
| Yes            | 53.76%    | 186 |
| No             | 19.65%    | 68  |
| Undecided      | 26.59%    | 92  |
| TOTAL          |           | 346 |

## Q27 Do you think the Society should partner with an existing journal?

Answered: 347 Skipped: 46

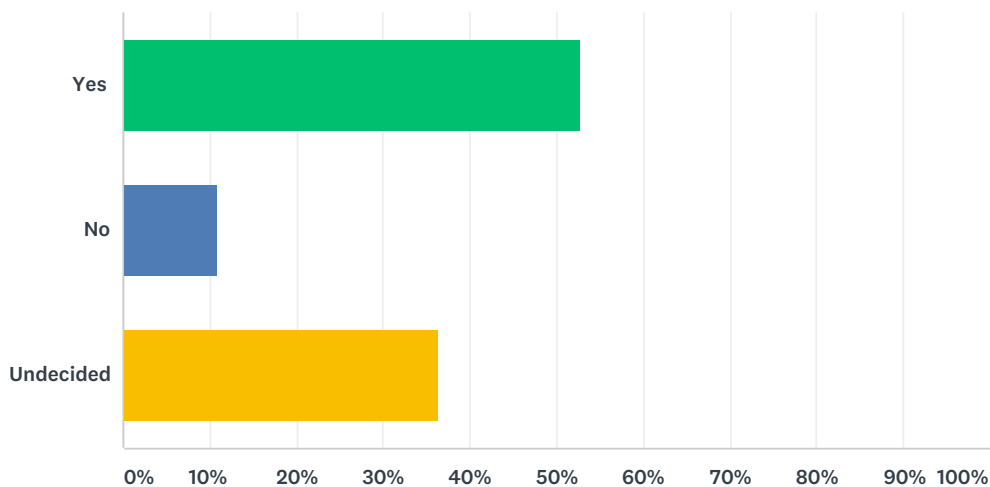

| ANSWER CHOICES | RESPONSES |     |
|----------------|-----------|-----|
| Yes            | 52.74%    | 183 |
| No             | 10.95%    | 38  |
| Undecided      | 36.31%    | 126 |
| TOTAL          |           | 347 |

## Q28 If the journal publishing model was Open Access, would you choose to publish your papers for a fee (e.g. \$2,500)?

Answered: 347 Skipped: 46

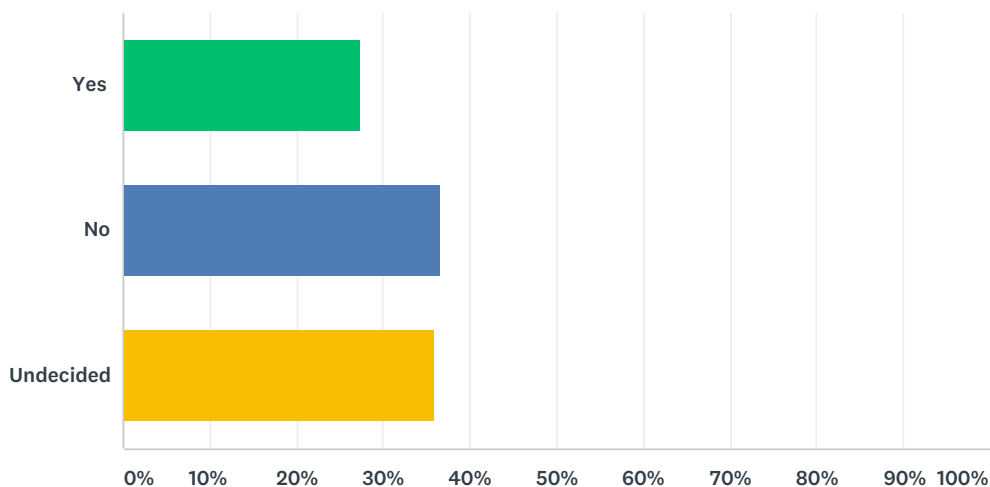

| ANSWER CHOICES | RESPONSES |     |
|----------------|-----------|-----|
| Yes            | 27.38%    | 95  |
| No             | 36.60%    | 127 |
| Undecided      | 36.02%    | 125 |
| TOTAL          |           | 347 |

## Q29 Do you think that Open Access Data Archiving (MetaboLights, Metabolomics Workbench, etc) should be prerequisite to publication?

Answered: 348 Skipped: 45

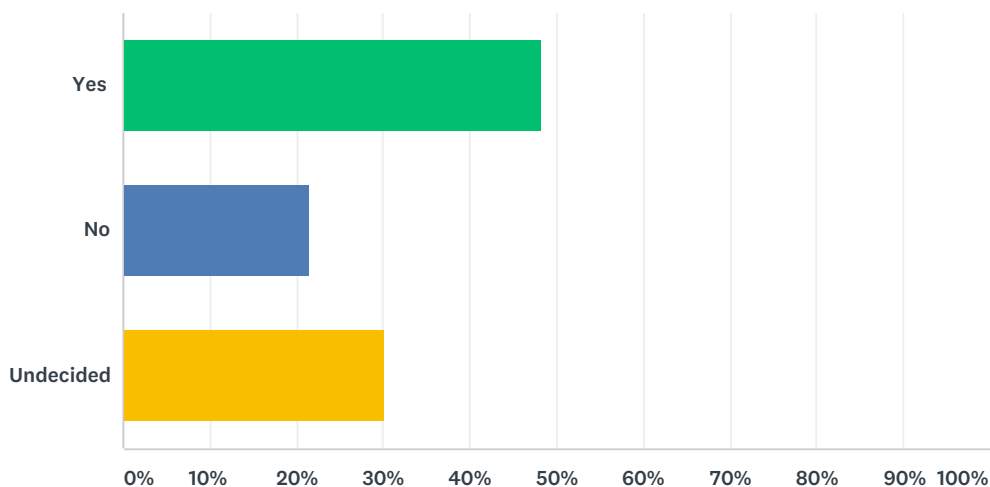

| ANSWER CHOICES | RESPONSES |     |
|----------------|-----------|-----|
| Yes            | 48.28%    | 168 |
| No             | 21.55%    | 75  |
| Undecided      | 30.17%    | 105 |
| TOTAL          |           | 348 |



**Q30 What additional member benefits, if any, would you like to see the Metabolomics Society provide to maintain and/or increase membership?**

Answered: 109   Skipped: 284

**Q31 What types of benefits or services, training opportunities, and Metabolomics Society initiatives should be explored for implementation over the next 5-10 years?**

Answered: 119   Skipped: 274

**Q32 If you would like to be entered to win a \$200 Amazon gift card, please provide your e-mail address.**

Answered: 240   Skipped: 153
